# Supplementary material for: Intact polar lipidome and membrane adaptations of microbial communities inhabiting serpentinite-hosted fluids
Source: Front Microbiol. 2023 Nov 10;14:1198786. doi: 10.3389/fmicb.2023.1198786 (PMC10667739; doi:10.3389/fmicb.2023.1198786)
Supplement: Supplementary file 3 [file Table_3.XLSX]

## Sheet: Sheet1
Standard	Chains	Formula	Full product name	Product #	Response Factor
MG-Cer	d18:1/18:0	C42H81NO8	D-glucosyl-B-1,1'-N-stearoyl-D-erythro-sphingosine	860547	21700000
PC-DAG-PAF	16:0/2:0	C26H54NO7P	1-hexadecanoyl-2-acetyl-sn-glycero-3-phosphocholine	878110	159000000
PC-DAG-C16	16:0/16:0	C40H80NO8P	1,2-dipalmitoyl-sn-glycero-3-phosphocholine	850355	70400000
PDME-DAG	16:0/16:0	C39H78NO8P	1,2-dipalmitoyl-sn-glycero-3-phosphoethanolamine-N,N-dimethyl	850854	62600000
PE-DAG-C16	16:0/16:0	C37H74NO8P	1,2-dipalmitoyl-sn-glycero-3-phosphoethanolamine	850705	23800000
PG-DAG	16:0/16:0	C38H75O10P	1,2-dipalmitoyl-sn-glycero-3-phospho-(1-rac-glycerol)(sodium salt)	840455	10600000
PME-DAG	16:0/16:0	C38H76NO8P	1,2-dipalmitoyl-sn-glycero-3-phosphoethanolamine-N-methyl	850851	27800000
PC-DAG-d7	15:0/18:1(d7)	C41D7H73NO8P	1-pentadecanoyl-2-oleoyl(d7)-sn-glycero-3-phosphocholine	791637	45000000
PE-DAG-d7	15:0/18:1(d7)	C38D7H67NO8P	1-pentadecanoyl-2-oleoyl(d7)-sn-glycero-3-phosphoethanolamine	791638	31100000
PG-DAG-d7	15:0/18:1(d7)	C39D7H68O10P	1-pentadecanoyl-2-oleoyl(d7)-sn-glycero-3-phosphoethanolamine	791640	1300000
DGTS-DAG-d9	16:0/16:0	C42D9H72NO7	1,2-dipalmitoyl-sn-glycero-3-O-4'-[N,N,N-trimethyl(d9)]-homoserine	857463	339000000
DGTS-DAG	16:0/16:0	C42H81NO7	1,2-dipalmitoyl-sn-glycero-3-O-4'-(N,N,N-trimethyl)-homoserine	857464	237000000
MGDG-DAG	mix; main: 16:3/18:3	C45H74O10	Monogalactosyldiacylglycerol (Plant)	840523	184000
PC-AR	archaeol	C48H100NO6P	1, 2-di-O-phytanyl-sn-glycerol-3-phoshocholine	999984C	88500000
PE-AR	archaeol	C45H94NO6P	1,2-di-O-phytanyl-sn-glycero-3-phosphoethanolamine	999985	37400000
SQ-DAG	16:0/18:3	C43H76O12S	sulfoquinovosyldiacylglycerol	840525	7150000
DGDG-DAG	mix; main: 18:3/18:3	C51H84O15	Digalactosyldiacylglycerol (Plant)	840524	1210000
CL-QAG	16:0/16:0/16:0/	C73H142O17P2	1-O-hexadecyl-2-oleoyl-sn-glycero-3-phosphocholine	710333	3320000
	16:00:00
PC-DEG	18:0/18:0	C44H92NO6P	1,2-di-O-octadecyl-sn-glycero-3-phosphocholine	999991	60000000
PC-AEG	16:0(ether)/18:1	C42H84NO7P	1-O-hexadecyl-2-oleoyl-sn-glycero-3-phosphocholine	878112	148000000
	(ester)
PC-MAG	18:00:00	C26H54NO7P	1-stearoyl-2-hydroxy-sn-glycero-3-phosphocholine	855775C	94300000
PG-MAG	17:01:00	C23H45O9P	1-(10Z-heptadecenoyl)-sn-glycero-3-phospho-(1'-rac-glycerol) (sodium salt)	858127C	4380000
PE-MAG	17:01:00	C22H44NO7P	1-(10Z-heptadecenoyl)-sn-glycero-3-phosphoethanolamine	856707C	18100000
PE-DEG	16:0/18:1	C39H80NO6P	1-O-hexadecanyl-2-O-(9Z-octadecenyl)-sn-glycero-3-phosphoethanolamine	999974P	26900000
PG-DEG	16:0/18:1	C40H81O8P	1-O-hexadecanyl-2-O-(9Z-octadecenyl)-sn-glycero-3-phospho-(1'-rac-glycerol) (ammonium salt)	999973P	1810000
PC-MEG	16:00:00	C24H52NO6P	1-O-hexadecyl-2-hydroxy-sn-glycero-3-phosphocholine	878119P	74300000
PE-AEG	16:0(ether)/18:1	C39H78NO7P	1-hexadecyl-2-(9Z-octadecenoyl)-sn-glycero-3-phosphoethanolamine	878130C	26800000
	(ester)
PC-DAG-C8	8:0/8:0	C24H48NO8P	1,2-dioctanoyl-sn-glycero-3-phosphocholine	850315C	142000000
PC-DAG-C23	23:0/23:0	C54H108NO8P	1,2-ditricosanoyl-sn-glycero-3-phosphocholine	850372P	47800000
PE-DAG-C15	15:0/15:0	C35H70NO8P	1,2-dipentadecanoyl-sn-glycero-3-phosphoethanolamine	850704P	24700000
DG-Cer	d18:1/24:0	C54H103NO13	D-lactosyl-ß-1,1' N-lignoceroyl-D-erythro-sphingosine	860577	5430000
Table S3.	Avanti Polar Lipid Standards and calculated response factors for calibration.
